# Supplementary material for: Super-stable SnO2/MoS2 enhanced the electrocatalytic hydrogen evolution in acidic environments
Source: Royal Society of Chemistry journal article supplement (doi:10.1039/d2ra03627d), 2022-01-01
Supplement: d2ra03627d1.pdf [file d2ra03627d1.pdf]

## Supplementary materials

### **Super-stable SnO<sub>2</sub>/MoS<sub>2</sub> enhanced the electrocatalytic hydrogen evolution in acidic environment**

Kun Huang,<sup>△a</sup> Lan Yang<sup>△a</sup>, Yihong Gao<sup>a</sup>, Shikuo Li<sup>\*b</sup>, Hui Zhang<sup>\*b</sup>, and Fangzhi Huang<sup>\*a</sup>

### **Sample Characterizations:**

Scanning electron microscopy (SEM) images were acquired on a Sigma 500 SEM instrument (SEISS, Germany). HRTEM images were performed on a JEM-2100 high-resolution transmission electron microscope. X-ray photoelectron spectroscopy (XPS)(ESCA Lab MKII) was used to detect the chemical composition of the sample. A powder X-ray diffraction (XRD) pattern was obtained using a Philips X'Pert PRO SUPER X-ray diffractometer equipped with graphite-monochromated Cu K $\alpha$  radiation ( $\lambda= 1.54056 \text{ \AA}$ ). The Raman spectra were collected using a Lab RAM HR800 confocal microscope Raman system (Horiba Jobin Yvon, 632.8nm) with a 50 $\times$  objective lens.

### **Electrochemical test**

The electrochemical workstation used in this work was purchased from Shanghai Chenhua. The electrode combination mode is a three-electrode mode. The load of SnO<sub>2</sub>/MoS<sub>2</sub> is about 0.035 g. It is used as the working electrode, the Platinum electrode is used as the counter electrode, and the 0.5 M H<sub>2</sub>SO<sub>4</sub> aqueous solution is used as the electrolysis environment. The HER performance of CC@MoS<sub>2</sub>, CC@SnO<sub>2</sub>, and CC@SnS<sub>2</sub> catalysts with the same loading capacity were also measured for comparison, and the Ag/AgCl electrode was used as a reference electrode. When the scanning speed is 1 mV s<sup>-1</sup>, the polarization curve is measured. The Tafel equation ( $\eta=a + b \log j$ ) can be used to find the Tafel slope from the LSV curve. Where  $\eta$  is the overpotential,  $a$  is the Tafel constant,  $b$  is the Tafel slope, and  $j$  is the current density. At the same time, a chronoamperometric test was performed to study the long-term stability of the catalyst at an overpotential of 166 mV. In the 0.2~0.4 V (vs. RHE) potential range (Faraday potential zone), the electric current is measured by measuring the double-layer capacitance ( $C_{dl}$ ) at different scan rates of 10, 20, 30, 40, 50 mV s<sup>-1</sup>. Chemically active area (ECSA). The linear slope of scanning speed and  $\Delta j$  is twice that of  $C_{dl}$ . 95% resistance compensation is used to obtain the true catalytic efficiency.

### **Theoretical calculation model**

The theoretical simulation calculation methods are all carried out using the academic version of CASTEP. The Perdew-Burke Ernzerhof (PBE) function based on Generalized Gradient Approximation (GGA) is used to process non-local exchange and

correlation energy. For the MoS<sub>2</sub> unit cell, the lattice parameters  $\alpha=\beta=\gamma=90^\circ$ ,  $a=5.446$  Å,  $b=3.15$  Å, and  $c=12.3$  Å. For the SnO<sub>2</sub> unit cell, the lattice parameters  $\alpha=\beta=\gamma=90^\circ$ ,  $a = b = 4.73727$ Å, and  $c = 3.18$ Å. The SnO<sub>2</sub>/MoS<sub>2</sub> interface is constructed with  $2 \times 3$  units of MoS<sub>2</sub> (001) and  $2 \times 2$  units of SnO<sub>2</sub> (001) surfaces.

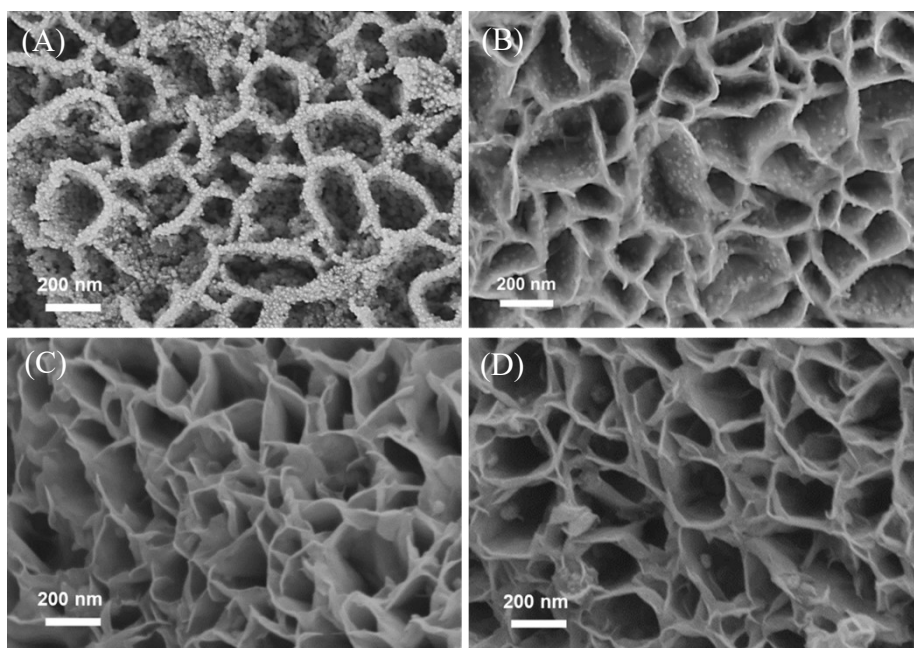

**Fig. S1** SEM diagram of samples grown with different amounts of MoS<sub>2</sub> (A) CC@SnO<sub>2</sub>/MoS<sub>2</sub> NSs-1 (B) CC@SnO<sub>2</sub>/MoS<sub>2</sub> NSs-2.5 (C) CC@SnO<sub>2</sub>/MoS<sub>2</sub> NSs-5 (D) CC@SnO<sub>2</sub>/MoS<sub>2</sub> NSs-10.

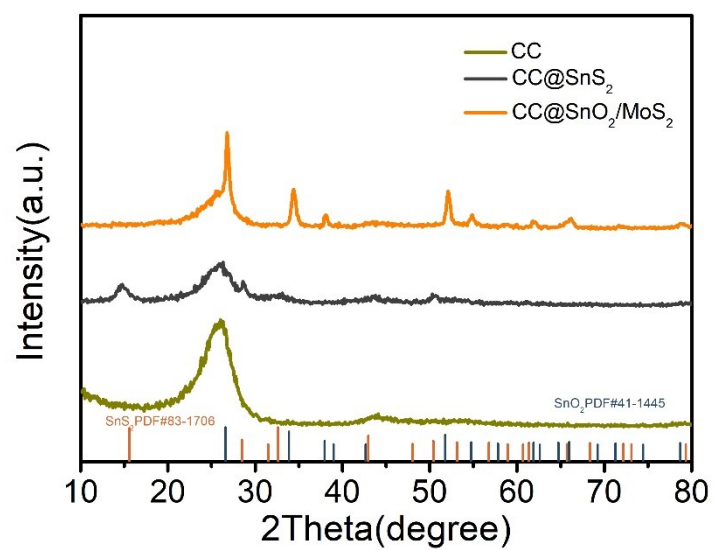

**Fig. S2** X-ray Diffraction (XRD) patterns of SnO<sub>2</sub>/MoS<sub>2</sub> NSs.

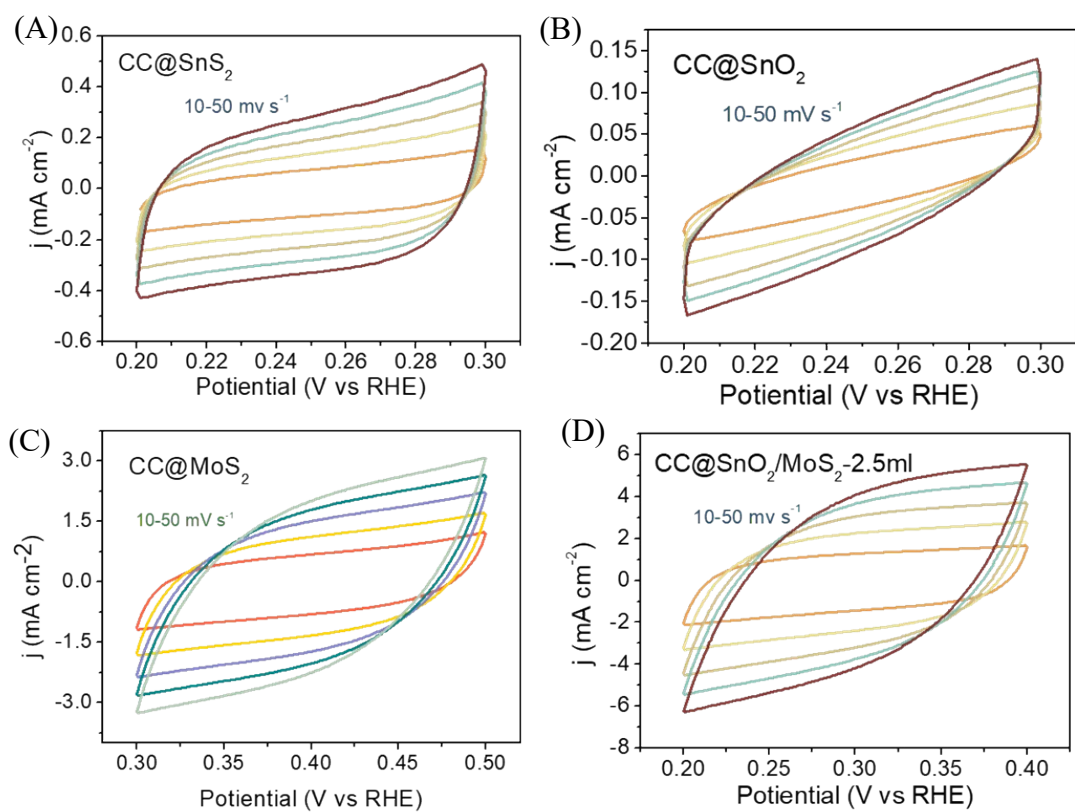

**Fig. S3** CV of (A)  $\text{CC@SnS}_2$  NSs (B)  $\text{CC@SnO}_2$  NSs (C)  $\text{CC@MoS}_2$  NSs and (D)  $\text{CC@SnO}_2/\text{MoS}_2$  NSs-2.5 at certain potential window at different scanning rates.

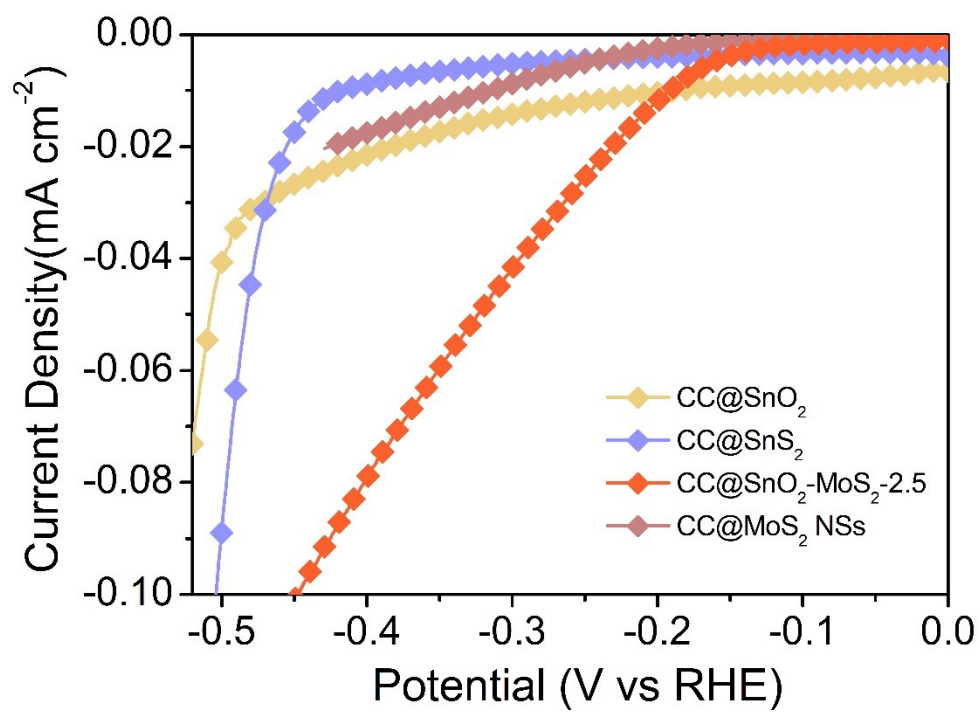

**Fig. S4** LSV curves of different samples at  $1 \text{ mV s}^{-1}$  normalized by ECSA.

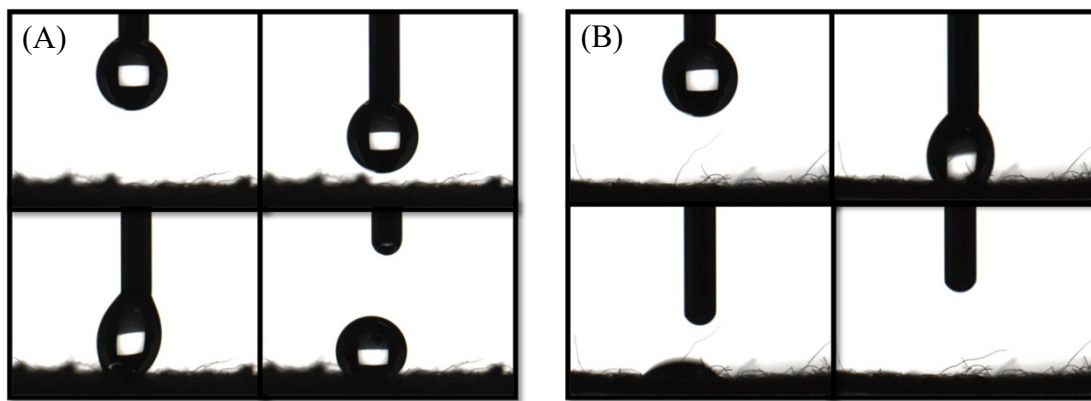

**Fig. S5** Optical photos of the wettability of (A) CC@MoS<sub>2</sub> NSs and (B) CC@SnO<sub>2</sub>/MoS<sub>2</sub> NSs-2.5 samples.



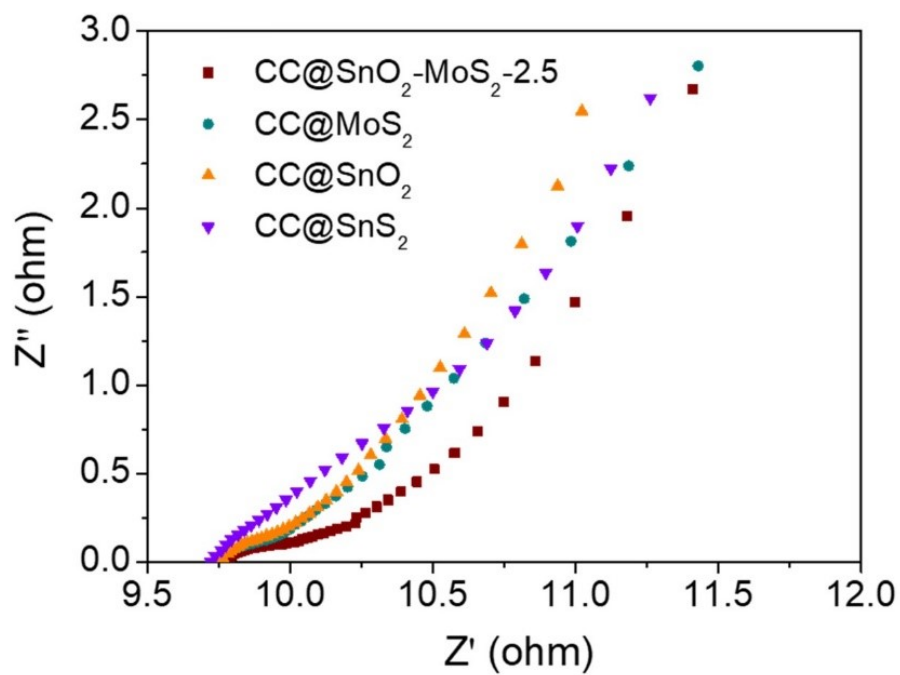

**Fig. S6** Electrochemical Impedance (EIS) of CC@SnO<sub>2</sub> NSs, CC@SnS<sub>2</sub> NSs, CC@MoS<sub>2</sub> NSs and CC@SnO<sub>2</sub>/MoS<sub>2</sub> NSs-2.5.

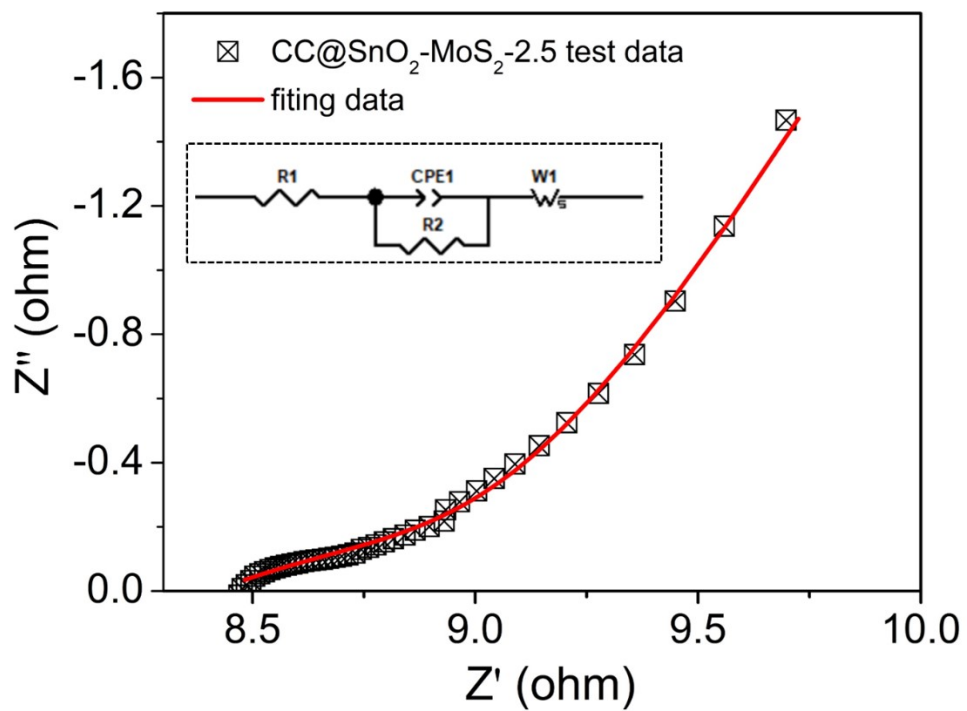

**Fig. S7** The resistance fitting curve and equivalent circuit of electrochemical impedance spectra (EIS) of CC@SnO<sub>2</sub>/MoS<sub>2</sub> - 2.5.
